Anesthesiology  
1997; 87:458  
© 1997 American Society of Anesthesiologists, Inc.  
Lippincott-Raven Publishers

## Perioperative Autologous Transfusion Service: A Logical Extension of our Role in the Operating Room

*To the Editor:*—Green<sup>1</sup> is to be commended for his enthusiastic endorsement of procedures long used by anesthesiologists to decrease the transfusion of allogenic (homologous) blood perioperatively. Caution, however, should be exercised in accepting his suggestion that anesthesiologists extend their efforts to assuming total responsibility for perioperative cell saving.

When preparing his American Association of Blood Banks (AABB)-mandated quality control program, Dr. Green may have been unaware of the AABB *Guidelines for Blood Salvage and Reinfusion in Surgery and Trauma*<sup>2</sup> subsequently endorsed by the National Heart, Lung, and Blood Institute (NHLBI) Expert Panel on the Use of Autologous Blood, which specifies the staffing requirements for operating cell-washing devices. The NHLBI document states: "It is essential to have a trained, dedicated operator to operate the equipment, even the newer, automated models."<sup>3</sup> The operation of the cell-saving apparatus, like the administration of an anesthetic, demands one's undivided, uninterrupted attention. This may preclude Green's suggestion that: "it is possible, in certain cases, to perform the anesthetic and operate the autotransfusion machine simultaneously."

Anesthesiologists should carefully consider the financial aspects of assuming responsibility for a cell-saving operation. Although Dr. Green may have saved the US Air Force \$15,000–20,000 in the first year of service, such savings may not extend to other situations. Many large institutions already use perfusionists or anesthesia technicians who are trained to operate cell savers, and others have contracts for

the provision of such services. The cost of these services may be reimbursable as a portion of the overall cost of operating the facility. There may, therefore, be no real dollar saving to the institution. When such a pass-through is not permissible, a group of anesthesiologists should consider the worth of such "value added" service in relation to the commitment required (providing around-the-clock coverage) for minimal financial return. In addition, the potential of increased exposure to liability claims must be considered.

**Howard L. Zauder, M.D., Ph.D.**

Chairman, Anesthesia Section  
Carl T. Hayden Veterans Affairs Medical Center  
Phoenix, Arizona 85012

### References

1. Green DM: Perioperative autologous transfusion service: A logical extension of our role in the operating room. *ANESTHESIOLOGY* 1997; 86:258
2. *Guidelines for Blood Salvage and Reinfusion in Surgery and Trauma*. Bethesda, American Association of Blood Banks, 1993
3. National Heart, Lung, and Blood Institute Expert Panel on the Use of Autologous Blood: Transfusion alert: Use of autologous blood. *Transfusion* 1995; 35:703–11

(Accepted for publication April 25, 1997.)

Anesthesiology  
1997; 87:458–9  
© 1997 American Society of Anesthesiologists, Inc.  
Lippincott-Raven Publishers

*In Reply:*—I appreciate Dr. Zauder's comments, and I am aware of the AABB/NHLBI guidelines; however, I do not agree with them. I taken them at their face value; only as guidelines and more importantly, not standards. "Guidelines are *recommendations* (italics added) for patient management that may identify a particular management strategy or a range of management strategies . . . Variances from practice parameters may be acceptable based on the judgment of the responsible anesthesiologist." All guidelines should be interpreted within the context of total patient care.

When I manage the cell-salvage machine, whether I medically supervise a CRNA or perform the anesthetic myself, I believe I provide better care to the patient. I have a heightened awareness of the blood loss, blood volume, and hemodynamic status of the patient. Further, after almost 2 years of involvement in cell salvage and after speaking with numerous OR/anesthesia technicians, OR nurses, perfusionists, and autotransfusionists throughout the country, I believe these guidelines are widely ignored. Perhaps these guidelines are widely ignored

because they are based on older machines that are less automated or viewed as too restrictive and unrealistic in today's economic climate and therefore are irrelevant. As half of our anesthesia group is now trained and certified on the autotransfusion machine, our surgical colleagues have the convenience in an emergency to arrange for cell salvage on short notice (15 min) without having to contact a local perfusion or autotransfusion contract group and hoping that somebody will be available within a reasonable amount of time. It is for these reasons that I propose that the anesthesiology service consider assuming this intraoperative service.

When stating, "it is possible in certain cases, to perform the anesthetic and operate the autotransfusion machine simultaneously," I was specifically referring to those cases in which blood loss is slow but constant. I do not think it is safe to simultaneously perform the anesthetic and run the machine in cases where large blood loss can occur acutely such, as in major vascular cases. With the advanced technology and full automation of the newest machines, I still believe

## CORRESPONDENCE

in certain, select cases the anesthesiologist can perform the anesthetic and operate the machine. Our colleagues in Europe and South America and in countries such as Sweden, France, and Chile are directly responsible for the cell-salvage equipment and personally manage the machine in slow blood loss cases. Like in our group, they will use a dedicated operator in cases where in large blood loss can occur acutely.

When considering the financial aspects of assuming responsibility for a cell-saving operation, I again disagree with Dr. Zauder. In our small hospital, we were able to save \$15,000–20,000 in the first year of service. I see no reason why such savings cannot extend to other situations than the military. That cost savings could be split between the anesthesia group and the originating cost center paying for the service. The relative savings will vary depending on the practice situation. It would be up to the anesthesia group at that hospital to determine the financial feasibility of establishing a cell-salvage division. Although it may be true that most large institutions already use perfusionists who are trained to operate the autotransfusion machines, there is still a significant number of hospitals that pay a

\* The views expressed in this material are those of the author and do not reflect the official policy or position of the U.S. Government, the Department of Defense, or the Department of the Air Force.

Anesthesiology  
1997; 87:459  
© 1997 American Society of Anesthesiologists, Inc.  
Lippincott-Raven Publishers

## Improving the Design of Muscle Relaxant Studies

*To the Editor:*—The paper by Lee *et al.* (ANESTHESIOLOGY, 1997; 86:48–54) raises important issues for research on the pharmacokinetics of muscle relaxants using adductor pollicis monitoring. It clearly indicates that the duration of ulnar nerve stimulation before muscle relaxant administration needs to be controlled within an individual experimental study, and considered when comparing results from different studies. As with any good study, we should ask questions concerning to what extent its findings can be generalized.

1. Does the duration of predrug stimulation affect clinical judgments that are typically made on the basis of train-of-four (TOF) fade? One would not think so. But because the authors used TOF monitoring, they could provide us with some insight concerning whether the time course of T<sub>4</sub>/T<sub>1</sub> was altered by the predrug stimulation, as was the T<sub>1</sub>.
2. Might the importance of the predrug stimulation period depend on the preload conditions? In animal experiments in which the preload is adjusted to maximal twitch tension, we do not see as large a progressive increase in twitch tension as Lee *et al.* report during the first 10 min of stimulation in their patients.
3. Do the authors have any data or expectations concerning the effect of predrug stimulation on adductor pollicis monitoring using electromyography (EMG) rather than isometric tension? If the increase in twitch tension which they observe during the predrug stimulation period is similar to the classic staircase (or *treppe*)

premium price for a contract perfusion or autotransfusion group to operate the machines. Bottom line: If somebody is being paid to perform this function, why can't it be a properly trained and certified member of the anesthesia team?

In considering the "potential of increased exposure to liability claims," let the anesthesia group determine its medicolegal tolerance to assuming such a service. With properly trained and certified personnel, as you receive from the aforementioned cell salvage and autotransfusion course, I believe this risk is very small because I can attest to a perfect 2-yr safety record at our institution.

In conclusion, our group is functioning as perioperative physicians. We are available on a consultative basis to recommend and perform blood sparing techniques such as 3-component separation, platelet pheresis, platelet gel, intraoperative hemodilution, and cell salvage to our surgical colleagues for challenging patients in ways a technician would never dream of.\*

**David M. Green, M.D., Major, U.S.A.F., M.C.**  
Director, Perioperative Autologous Transfusion Service  
Department of Surgery  
Anesthesia Service/SGOSA  
David Grant Medical Center  
Travis AFB, California 94535

(Accepted for publication April 25, 1997.)

phenomenon of muscle, then it may not be as important to control the duration of the predrug stimulation period in studies using EMG.

The authors suggest that tetanic stimulation for 5 s obviates the need for a prolonged stabilization period for predrug stimulation. This conclusion is based on their finding that recovery times for short predrug stimulation periods, which included a tetanus, did not differ from those with prolonged pre-drug stimulation periods. However, more fundamental lessons can be learned from their study. First, a "control" period should not be considered a control until it can be expected to be stable over time. Second, researchers must exercise caution in comparing (and combining) findings from different studies. Consistent differences in seemingly unimportant experimental conditions can confound interpretation.

**Robert J. Storella, Jr., Ph.D.**  
Department of Anesthesiology  
Allegheny University of the Health Sciences  
Broad and Vine  
Mail Stop 310  
Philadelphia, Pennsylvania 19102-1192

(Accepted for publication April 25, 1997.)
